# Supplementary material for: High-mobility group box-1 impedes skeletal muscle regeneration via downregulation of Pax-7 synthesis by increasing miR-342-5p expression
Source: publisher site journal article supplement (doi:10.18632/aging.205202), 2023-11-13
Supplement: Supplementary file [file aging-v15i21-205202-supplementary-material-SD1.pdf]

## SUPPLEMENTARY TABLE

Supplementary Table 1. Primers sequences for qRT-PCR.

| Genes       | Forward (5'-3')          | Reverse (5'-3')      |
|-------------|--------------------------|----------------------|
| Pax-7       | GGTCCCCAGGATGATGAGA      | TTGATGAAGACCCACCAAG  |
| GAPDH       | ACCACAGTCCATGCCATCAC     | TCCACCACCCTGTTGCTGTA |
| miR-185-3p  | AGGGGCTGGCTTTCCTCTGGT    | TGGTGTCGTGGAGTCG     |
| miR-206-3p  | TGGAATGTAAGGAAGTGTGTGG   | TGGTGTCGTGGAGTCG     |
| miR-342-5p  | AGGGGTGCTATCTGTGATTGAG   | TGGTGTCGTGGAGTCG     |
| miR-499-3p  | GAACATCACAGCAAGTCTGTGCT  | TGGTGTCGTGGAGTCG     |
| miR-742-3p  | GAAAGCCACCATGCTGGGTAAG   | TGGTGTCGTGGAGTCG     |
| miR-1194    | TCCTAGATCGTCAATGAGTAAG   | TGGTGTCGTGGAGTCG     |
| miR-133c    | TTTGGTCCCCTTCAAGGAGTCAG  | TGGTGTCGTGGAGTCG     |
| miR-133b-3p | TTTGGTCCCCTTCAACCAGCTA   | TGGTGTCGTGGAGTCG     |
| miR-1949    | CTATACCAGGATGTCAGCATAGTT | TGGTGTCGTGGAGTCG     |
| miR-3078-3p | TTGCTGGGGTAGTCTTTAGG     | TGGTGTCGTGGAGTCG     |
| miR-3475-3p | TCTGGAGGCACATGGTTTGAA    | TGGTGTCGTGGAGTCG     |
| miR-5127    | TCTCCCAACCCTTTTCCCA      | TGGTGTCGTGGAGTCG     |
| U6 snRNA    | CTCGCTTCGGCAGCACA        | AACGCTTCACGAATTTGCGT |
